# Supplementary material for: Patient Experience at US Hospitals Following the Caregiver Advise, Record, Enable (CARE) Act
Source: PubMed Central journal article supplement (PMC10152302; doi:10.1001/jamanetworkopen.2023.11253), 2023-05-01
Supplement: jamanetwopen-e2311253-s001.pdf [file jamanetwopen-e2311253-s001.pdf]

## Supplemental Online Content

Lee CR, Taggart E, Coe NB, Chatterjee P. Patient experience at US hospitals following the Caregiver Advise, Record, Enable (CARE) Act. *JAMA Netw Open*. 2023;6(5):e2311253. doi:10.1001/jamanetworkopen.2023.11253

**eFigure 1.** Flow Diagram of Sample Creation

**eTable 1.** State-Level Passage of the CARE Act and Year Assigned in Analyses

**eTable 2.** Timeline of State-Level Adoption of the CARE Act by State

**eTable 3.** Hospital Consumer Assessment of Healthcare Providers and Systems (HCAHPS) Measurement Dates and Year Assignments for Quality Measures

**eTable 4.** Overview of CARE Act Policy by State

**eTable 5.** State-Level Caregiving Initiatives by State

**eFigure 2.** Hospital Consumer Assessment of Healthcare Providers and Systems (HCAHPS) Survey Instrument

**eFigure 3.** Frequency of Missingness for Hospitals Over the Study Period (2013-2019)

**eTable 6.** Hospital Characteristics by CARE Act Passage Across All Years (2013-2019)

**eAppendix.** Estimation Method Used in Callaway and Sant'Anna Differences-in-Differences Approach

**eTable 7.** Regression Estimates for Parallel Pre-trends

**eFigure 5.** Performance on HCAHPS, Unadjusted Means Over Time—Hospitals in CARE Act States vs. Non-CARE Act States

**eFigure 6.** Estimates of Adjusted Differences in Care Transition Information Between Hospitals in CARE Act States vs Non-CARE Act States

**eTable 8.** Differential Changes in Patient Experience and Readmissions Scores Between Hospitals in CARE Act and Non-CARE Act States by Time From Exposure

**eTable 9.** Regression Estimates After Adding Interaction Term Between State and Year

**eTable 10.** Regression Estimates Using Composite Scores of Top Box and Middle Box Responses

This supplemental material has been provided by the authors to give readers additional information about their work.

**eFigure 1. Flow Diagram of Sample Creation**

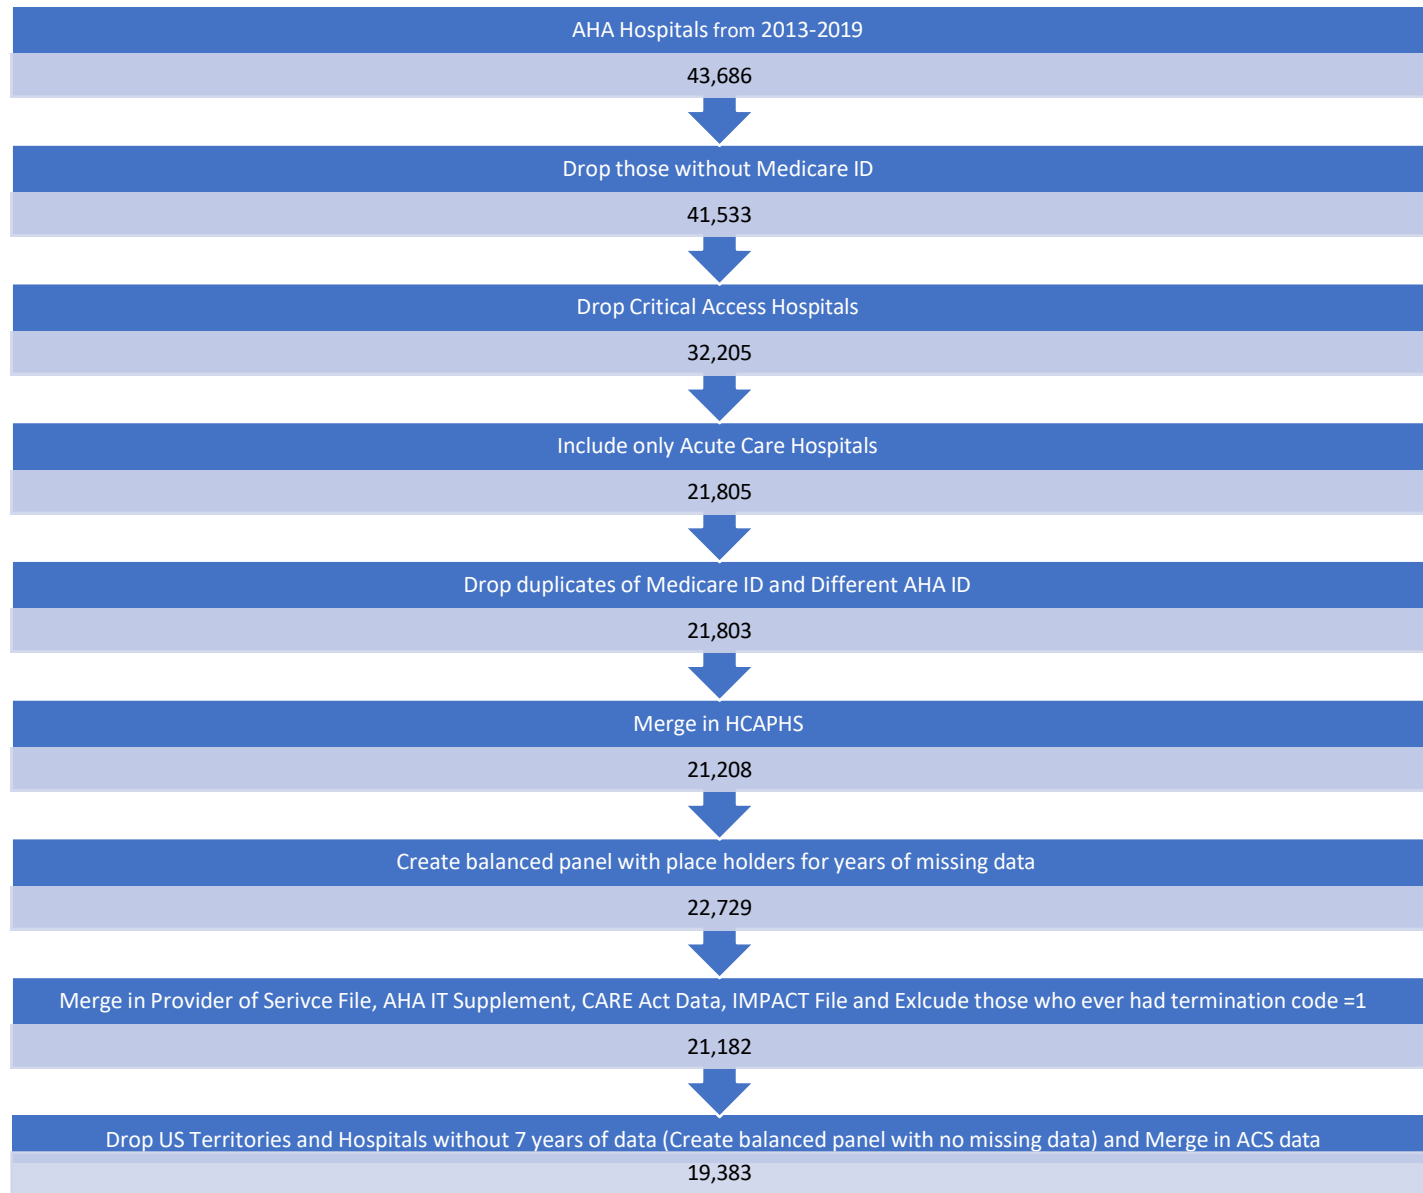

**eTable 1. State-Level Passage of the CARE Act and Year Assigned in Analyses**

| <b>State</b> | <b>Enactment Date</b> | <b>Year Assignment in Analyses</b> |
|--------------|-----------------------|------------------------------------|
| AK           | 1/1/17                | 2018                               |
| AL           | N/A                   | --                                 |
| AR           | 7/22/15               | 2016                               |
| AZ           | 1/1/21                | --                                 |
| CA           | 1/1/16                | 2017                               |
| CO           | 5/8/15                | 2016                               |
| CT           | 10/1/15               | 2016                               |
| DC           | 7/1/2016              | 2017                               |
| DE           | 1/1/17                | 2018                               |
| FL           | N/A                   | --                                 |
| GA           | 7/1/22                | --                                 |
| HI           | 7/1/17                | 2018                               |
| IA           | 7/1/19                | --                                 |
| ID           | N/A                   | --                                 |
| IL           | 1/27/16               | 2017                               |
| IN           | 1/1/16                | 2017                               |
| KS           | 7/1/18                | 2019                               |
| KY           | 6/29/17               | 2018                               |
| LA           | 8/1/16                | 2017                               |
| MA           | 11/8/17               | 2018                               |
| MD           | 10/1/16               | 2017                               |
| ME           | 10/15/15              | 2016                               |
| MI           | 7/12/16               | 2017                               |
| MN           | 1/1/17                | 2018                               |
| MO           | 8/28/18               | 2019                               |
| MS           | 7/1/15                | 2016                               |
| MT           | 10/1/17               | 2018                               |
| NC           | N/A                   | --                                 |
| ND           | 8/1/19                | --                                 |
| NE           | 3/30/16               | 2017                               |
| NH           | 1/1/16                | 2017                               |

|    |         |      |
|----|---------|------|
| NJ | 5/12/15 | 2016 |
| NM | 6/17/15 | 2016 |
| NV | 10/1/15 | 2016 |
| NY | 4/23/16 | 2017 |
| OH | 3/21/17 | 2018 |
| OK | 11/5/14 | 2015 |
| OR | 1/1/16  | 2017 |
| PA | 4/20/17 | 2018 |
| RI | 3/14/17 | 2018 |
| SC | N/A     | --   |
| SD | N/A     | --   |
| TN | 6/6/19  | --   |
| TX | 5/26/17 | 2018 |
| UT | 2/10/16 | 2017 |
| VA | 7/1/15  | 2016 |
| VT | N/A     | --   |
| WA | 6/9/16  | 2017 |
| WI | N/A     | --   |
| WV | 6/8/15  | 2016 |
| WY | 7/1/16  | 2017 |

For all states that passed the CARE Act, the dates reflect when the policy was passed (Last updated by AARP [here](#) in 10/2020). The corresponding year assignment in analyses lags by one year to account for potential delay in policy implementation within hospitals.

**eTable 2. Timeline of State-Level Adoption of the CARE Act by State**

|             |             |             |             |             |             |             |             |             |             |
|-------------|-------------|-------------|-------------|-------------|-------------|-------------|-------------|-------------|-------------|
|             |             |             |             |             |             |             |             |             |             |
|             |             |             | WY (Jul)    |             |             |             |             |             |             |
|             |             |             | DC (Jul)    |             |             |             |             |             |             |
|             |             |             | WA (Jun)    |             |             |             |             |             |             |
|             |             |             | VI (Mar)    |             |             |             |             |             |             |
|             |             |             | UT (Feb)    | TX (May)    |             |             |             |             |             |
|             |             | WV (Jun)    | OR (Jan)    | RI (Mar)    |             |             |             |             |             |
|             |             | VA (Jul)    | NY (Apr)    | PA (Apr)    |             |             |             |             |             |
|             |             | NM (Jun)    | NH (Jan)    | OH (Mar)    |             |             |             |             |             |
|             |             | NJ (May)    | NE (Mar)    | MT (Oct)    |             |             |             |             |             |
|             |             | NV (Oct)    | MI (Jul)    | MN (Jan)    |             |             |             |             |             |
|             |             | MS (Jul)    | MD (Oct)    | MA (Nov)    |             |             |             |             |             |
|             |             | ME (Oct)    | LA (Aug)    | KY (Jun)    |             |             |             |             |             |
|             |             | CT (Oct)    | IN (Jan)    | HI (Jul)    |             | TN (Jun)    |             |             |             |
|             |             | CO (May)    | IL (Jul)    | DE (Jan)    | MO (Aug)    | ND (Aug)    |             |             |             |
|             | OK (Nov)    | AR (Jul)    | CA (Jan)    | AK (Jan)    | KS (Jul)    | IA (Jul)    |             | AZ (Jan)    | GA (Jul)    |
| <b>2013</b> | <b>2014</b> | <b>2015</b> | <b>2016</b> | <b>2017</b> | <b>2018</b> | <b>2019</b> | <b>2020</b> | <b>2021</b> | <b>2022</b> |

Never-passed States: AL, FL, ID, NC, SC, SD, VT, WI

**eTable 3. Hospital Consumer Assessment of Healthcare Providers and Systems (HCAHPS) Measurement Dates and Year Assignments for Quality Measures**

| Quality Measure | Hospital Compare Reporting Year | Measurement Dates   | Year Assigned for Analysis |
|-----------------|---------------------------------|---------------------|----------------------------|
| HCAHPS          | 2014                            | 1/1/2013-12/31/2013 | 2013                       |
|                 | 2015                            | 1/1/2014-12/31/2014 | 2014                       |
|                 | 2016                            | 1/1/2015-12/31/2015 | 2015                       |
|                 | 2017                            | 1/1/2016-12/31/2016 | 2016                       |
|                 | 2018                            | 1/1/2017-12/31/2017 | 2017                       |
|                 | 2019                            | 1/1/2018-12/31/2018 | 2018                       |
|                 | 2020                            | 1/1/2019-12/31/2019 | 2019                       |

For each reporting year of HCAHPS, measurements represent the prior year and were assigned as such in the analyses.

**eTable 4. Overview of CARE Act Policy by State**

For all states that passed the CARE Act, no hospital was held liable for identifying a caregiver prior to executing patient discharge. No state required hospitals to be monitored at the state level except for Pennsylvania, which requires the Legislative Budget and Finance Committee to conduct a study no later than three years after the effective date of Section 9 of Pennsylvania’s CARE Act legislation. This study is regarding the impact of the CARE act in certain patient outcomes, including, but not limited to, hospital readmissions.

|                      |    | CARE Act Legislation |                                         |                                                             |                                               |                                        |                                                                 |                  |
|----------------------|----|----------------------|-----------------------------------------|-------------------------------------------------------------|-----------------------------------------------|----------------------------------------|-----------------------------------------------------------------|------------------|
| State                |    | Date of Legalization | First year of analysis coded as enacted | Elements of advise, record, & enable present <sup>a-c</sup> | Alternatives given for incapacitated patients | Hospital Liable for Caregiver Training | Responsibility of hospital to find caregiver prior to discharge | State Monitoring |
| Alaska               | AK | 1/1/17               | 2018                                    | X                                                           | X                                             | No                                     | No                                                              | No               |
| Arizona <sup>d</sup> | AZ | 1/1/21               | N/A                                     | N/A                                                         | N/A                                           | N/A                                    | N/A                                                             | N/A              |
| Arkansas             | AR | 7/22/15              | 2016                                    | X                                                           |                                               | No                                     | No                                                              | No               |
| California           | CA | 1/1/16               | 2017                                    | X                                                           | X                                             | No                                     | No                                                              | No               |
| Colorado             | CO | 5/8/15               | 2016                                    | X                                                           | X                                             | No                                     | No                                                              | No               |
| Connecticut          | CT | 10/1/15              | 2016                                    | X                                                           |                                               | No                                     | No                                                              | No               |
| Delaware             | DE | 1/1/17               | 2018                                    | X                                                           |                                               | No                                     | No                                                              | No               |
| Georgia              | GA | 7/1/22               | N/A                                     | X                                                           |                                               | No                                     | No                                                              | No               |
| Hawaii               | HI | 7/1/17               | 2018                                    | X                                                           |                                               | No                                     | No                                                              | No               |
| Illinois             | IL | 1/27/16              | 2017                                    | X                                                           | X                                             | No                                     | No                                                              | No               |
| Indiana              | IN | 1/1/16               | 2017                                    | X                                                           |                                               | No                                     | No                                                              | No               |
| Iowa                 | IA | 7/1/19               | 2020                                    | X                                                           | X                                             | No                                     | No                                                              | No               |
| Kansas               | KS | 7/1/18               | 2019                                    | X                                                           |                                               | No                                     | No                                                              | No               |
| Kentucky             | KY | 6/29/17              | 2018                                    | X                                                           | X                                             | No                                     | No                                                              | No               |
| Louisiana            | LA | 8/1/16               | 2017                                    | X                                                           | X                                             | No                                     | No                                                              | No               |
| Maine                | ME | 10/15/15             | 2016                                    | X                                                           | X                                             | No                                     | No                                                              | No               |
| Maryland             | MD | 10/1/16              | 2017                                    | X                                                           |                                               | No                                     | No                                                              | No               |
| Massachusetts        | MA | 11/8/17              | 2018                                    | X                                                           | X                                             | No                                     | No                                                              | No               |
| Michigan             | MI | 7/12/16              | 2016                                    | X                                                           | X                                             | No                                     | No                                                              | No               |
| Minnesota            | MN | 1/1/17               | 2018                                    | X                                                           | X                                             | No                                     | No                                                              | No               |
| Mississippi          | MS | 7/1/15               | 2016                                    | X                                                           | X                                             | No                                     | No                                                              | No               |
| Missouri             | MO | 8/28/18              | 2019                                    | X                                                           |                                               | No                                     | No                                                              | No               |
| Montana              | MT | 10/1/17              | 2018                                    | X                                                           |                                               | No                                     | No                                                              | No               |
| Nebraska             | NE | 3/30/16              | 2017                                    | X                                                           | X                                             | No                                     | No                                                              | No               |

|                        |    |         |      |     |     |     |     |     |
|------------------------|----|---------|------|-----|-----|-----|-----|-----|
| Nevada                 | NV | 10/1/15 | 2016 | X   | X   | No  | No  | No  |
| New Hampshire          | NH | 1/1/16  | 2017 | X   | X   | No  | No  | No  |
| New Jersey             | NJ | 5/12/15 | 2016 | X   | X   | No  | No  | No  |
| New Mexico             | NM | 6/17/15 | 2016 | X   |     | No  | No  | No  |
| New York               | NY | 4/23/16 | 2017 | X   | X   | No  | No  | No  |
| North Dakota           | ND | 8/1/19  | 2020 | X   | X   | No  | No  | No  |
| Ohio                   | OH | 3/21/17 | 2018 | X   | X   | No  | No  | No  |
| Oklahoma               | OK | 11/5/14 | 2015 | X   | X   | No  | No  | No  |
| Oregon                 | OR | 1/1/16  | 2017 | X   |     | No  | No  | No  |
| Pennsylvania           | PA | 4/20/17 | 2018 | X   | X   | No  | No  | Yes |
| Rhode Island           | RI | 3/14/17 | 2018 | X   | X   | No  | No  | No  |
| Tennessee <sup>d</sup> | TN | 6/6/19  | N/A  | N/A | N/A | N/A | N/A | N/A |
| Texas                  | TX | 5/26/17 | 2018 | X   |     | No  | No  | No  |
| Utah                   | UT | 2/10/16 | 2017 | X   |     | No  | No  | No  |
| Virginia               | VA | 7/1/15  | 2016 | X   |     | No  | No  | No  |
| Washington             | WA | 6/9/16  | 2017 | X   |     | No  | No  | No  |
| West Virginia          | WV | 6/8/15  | 2016 | X   | X   | No  | No  | No  |
| Wyoming                | WY | 7/1/16  | 2017 | X   | X   | No  | No  | No  |
| Alabama                | AL | --      |      |     |     |     |     |     |
| Florida                | FL | --      |      |     |     |     |     |     |
| Idaho                  | ID | --      |      |     |     |     |     |     |
| North Carolina         | NC | --      |      |     |     |     |     |     |
| South Carolina         | SC | --      |      |     |     |     |     |     |
| South Dakota           | SD | --      |      |     |     |     |     |     |
| Vermont                | VT | --      |      |     |     |     |     |     |
| Wisconsin              | WI | --      |      |     |     |     |     |     |

<sup>a</sup>Advise is defined as notification to individuals of their opportunity to identify a family caregiver.

<sup>b</sup>Record is defined as documentation of the caregiver's name and contact information in the health record (with the patient's permission).

<sup>c</sup>Enable is defined as notification of discharge, providing training instructions for medical-nursing tasks, or providing written materials, such as discharge summary summarizing reason for and treatments provided during hospitalization.

<sup>d</sup>The researchers were unable to CARE Act legislation for these states.

eTable 5. State-Level Caregiving Initiatives by State

|               |    | State-level Caregiving Initiatives |                                          |                                 |       |
|---------------|----|------------------------------------|------------------------------------------|---------------------------------|-------|
|               |    | Caregiver Support Programs         | Workplace Benefits for Family Caregivers | Home & Community Based Services | Other |
| State         |    |                                    |                                          |                                 |       |
| Alaska        | AK | X                                  | X                                        | X                               |       |
| Arizona       | AZ | X                                  | X                                        | X                               | X     |
| Arkansas      | AR | X                                  | X                                        | X                               |       |
| California    | CA | X                                  | X                                        | X                               | X     |
| Colorado      | CO | X                                  | X                                        | X                               | X     |
| Connecticut   | CT | X                                  | X                                        | X                               |       |
| Delaware      | DE | X                                  | X                                        | X                               |       |
| Georgia       | GA | X                                  |                                          | X                               |       |
| Hawaii        | HI | X                                  | X                                        | X                               | X     |
| Illinois      | IL | X                                  |                                          | X                               |       |
| Indiana       | IN | X                                  |                                          | X                               |       |
| Iowa          | IA | X                                  | X                                        |                                 | X     |
| Kansas        | KS | X                                  | X                                        | X                               |       |
| Kentucky      | KY | X                                  |                                          | X                               |       |
| Louisiana     | LA | X                                  |                                          | X                               |       |
| Maine         | ME | X                                  | X                                        | X                               |       |
| Maryland      | MD | X                                  |                                          | X                               | X     |
| Massachusetts | MA | X                                  | X                                        | X                               |       |
| Michigan      | MI | X                                  | X                                        | X                               |       |
| Minnesota     | MN | X                                  | X                                        | X                               | X     |
| Mississippi   | MS | X                                  |                                          | X                               |       |
| Missouri      | MO | X                                  |                                          | X                               | X     |
| Montana       | MT | X                                  |                                          | X                               |       |
| Nebraska      | NE | X                                  | X                                        | X                               | X     |
| Nevada        | NV | X                                  | X                                        | X                               |       |
| New Hampshire | NH | X                                  | X                                        | X                               |       |
| New Jersey    | NJ | X                                  | X                                        | X                               |       |
| New Mexico    | NM | X                                  |                                          | X                               |       |
| New York      | NY | X                                  | X                                        | X                               | X     |
| North Dakota  | ND | X                                  |                                          | X                               |       |
| Ohio          | OH | X                                  |                                          | X                               |       |



|                |    |   |   |   |   |
|----------------|----|---|---|---|---|
| Oklahoma       | OK | X | X | X |   |
| Oregon         | OR | X | X | X |   |
| Pennsylvania   | PA | X | X | X | X |
| Rhode Island   | RI |   | X | X |   |
| Tennessee      | TN | X |   | X |   |
| Texas          | TX | X | X | X | X |
| Utah           | UT | X |   | X |   |
| Virginia       | VA | X |   | X |   |
| Washington     | WA | X | X | X |   |
| West Virginia  | WV | X |   | X |   |
| Wyoming        | WY | X |   | X | X |
| Alabama        | AL | X |   | X |   |
| Florida        | FL | X |   | X |   |
| Idaho          | ID | X | X | X |   |
| North Carolina | NC | X |   | X | X |
| South Carolina | SC | X | X | X |   |
| South Dakota   | SD | X |   | X |   |
| Vermont        | VT | X |   | X |   |
| Wisconsin      | WI | X |   | X |   |

eFigure 2. Hospital Consumer Assessment of Healthcare Providers and Systems (HCAHPS) Survey Instrument

## HCAHPS Survey

### SURVEY INSTRUCTIONS

- ◆ You should only fill out this survey if you were the patient during the hospital stay named in the cover letter. Do not fill out this survey if you were not the patient.
- ◆ Answer all the questions by checking the box to the left of your answer.
- ◆ You are sometimes told to skip over some questions in this survey. When this happens you will see an arrow with a note that tells you what question to answer next, like this:

- Yes  
 No → **If No, Go to Question 1**

**You may notice a number on the survey. This number is used to let us know if you returned your survey so we don't have to send you reminders.**

**Please note: Questions 1-29 in this survey are part of a national initiative to measure the quality of care in hospitals. OMB #0938-0981 (Expires September 30, 2024)**

Please answer the questions in this survey about your stay at the hospital named on the cover letter. Do not include any other hospital stays in your answers.

#### YOUR CARE FROM NURSES

1. During this hospital stay, how often did nurses treat you with courtesy and respect?

- 1  Never  
2  Sometimes  
3  Usually  
4  Always

2. During this hospital stay, how often did nurses listen carefully to you?

- 1  Never  
2  Sometimes  
3  Usually  
4  Always

3. During this hospital stay, how often did nurses explain things in a way you could understand?

- 1  Never  
2  Sometimes  
3  Usually  
4  Always

4. During this hospital stay, after you pressed the call button, how often did you get help as soon as you wanted it?

- 1  Never  
2  Sometimes  
3  Usually  
4  Always  
9  I never pressed the call button

## YOUR CARE FROM DOCTORS

---

5. During this hospital stay, how often did doctors treat you with courtesy and respect?

1  Never  
2  Sometimes  
3  Usually  
4  Always

6. During this hospital stay, how often did doctors listen carefully to you?

1  Never  
2  Sometimes  
3  Usually  
4  Always

7. During this hospital stay, how often did doctors explain things in a way you could understand?

1  Never  
2  Sometimes  
3  Usually  
4  Always

## THE HOSPITAL ENVIRONMENT

---

8. During this hospital stay, how often were your room and bathroom kept clean?

1  Never  
2  Sometimes  
3  Usually  
4  Always

9. During this hospital stay, how often was the area around your room quiet at night?

1  Never  
2  Sometimes  
3  Usually  
4  Always

## YOUR EXPERIENCES IN THIS HOSPITAL

---

10. During this hospital stay, did you need help from nurses or other hospital staff in getting to the bathroom or in using a bedpan?

1  Yes  
2  No → If No, Go to Question 12

11. How often did you get help in getting to the bathroom or in using a bedpan as soon as you wanted?

1  Never  
2  Sometimes  
3  Usually  
4  Always

12. During this hospital stay, were you given any medicine that you had not taken before?

1  Yes  
2  No → If No, Go to Question 15

13. Before giving you any new medicine, how often did hospital staff tell you what the medicine was for?

1  Never  
2  Sometimes  
3  Usually  
4  Always

14. Before giving you any new medicine, how often did hospital staff describe possible side effects in a way you could understand?

1  Never  
2  Sometimes  
3  Usually  
4  Always

## WHEN YOU LEFT THE HOSPITAL

---

15. After you left the hospital, did you go directly to your own home, to someone else's home, or to another health facility?
- Own home
  - Someone else's home
  - Another health facility → If Another, Go to Question 18
16. During this hospital stay, did doctors, nurses or other hospital staff talk with you about whether you would have the help you needed when you left the hospital?
- Yes
  - No
17. During this hospital stay, did you get information in writing about what symptoms or health problems to look out for after you left the hospital?
- Yes
  - No

## OVERALL RATING OF HOSPITAL

---

Please answer the following questions about your stay at the hospital named on the cover letter. Do not include any other hospital stays in your answers.

18. Using any number from 0 to 10, where 0 is the worst hospital possible and 10 is the best hospital possible, what number would you use to rate this hospital during your stay?

- 0 Worst hospital possible
- 1
- 2
- 3
- 4
- 5
- 6
- 7
- 8
- 9
- 10 Best hospital possible

19. Would you recommend this hospital to your friends and family?

- Definitely no
- Probably no
- Probably yes
- Definitely yes

## UNDERSTANDING YOUR CARE WHEN YOU LEFT THE HOSPITAL

---

20. During this hospital stay, staff took my preferences and those of my family or caregiver into account in deciding what my health care needs would be when I left.

- Strongly disagree
- Disagree
- Agree
- Strongly agree

21. When I left the hospital, I had a good understanding of the things I was responsible for in managing my health.

- 1  Strongly disagree
- 2  Disagree
- 3  Agree
- 4  Strongly agree

22. When I left the hospital, I clearly understood the purpose for taking each of my medications.

- 1  Strongly disagree
- 2  Disagree
- 3  Agree
- 4  Strongly agree
- 5  I was not given any medication when I left the hospital

---

### ABOUT YOU

---

There are only a few remaining items left.

23. During this hospital stay, were you admitted to this hospital through the Emergency Room?

- 1  Yes
- 2  No

24. In general, how would you rate your overall health?

- 1  Excellent
- 2  Very good
- 3  Good
- 4  Fair
- 5  Poor

25. In general, how would you rate your overall mental or emotional health?

- 1  Excellent
- 2  Very good
- 3  Good
- 4  Fair
- 5  Poor

26. What is the highest grade or level of school that you have completed?

- 1  8th grade or less
- 2  Some high school, but did not graduate
- 3  High school graduate or GED
- 4  Some college or 2-year degree
- 5  4-year college graduate
- 6  More than 4-year college degree

27. Are you of Spanish, Hispanic or Latino origin or descent?

- 1  No, not Spanish/Hispanic/Latino
- 2  Yes, Puerto Rican
- 3  Yes, Mexican, Mexican American, Chicano
- 4  Yes, Cuban
- 5  Yes, other Spanish/Hispanic/Latino

28. What is your race? Please choose one or more.

- 1  White
- 2  Black or African American
- 3  Asian
- 4  Native Hawaiian or other Pacific Islander
- 5  American Indian or Alaska Native

**29. What language do you mainly speak at home?**

- 1  English
- 2  Spanish
- 3  Chinese
- 4  Russian
- 5  Vietnamese
- 6  Portuguese
- 7  German
- 8  Tagalog
- 9  Arabic
- 20  Some other language (please print): \_\_\_\_\_

*NOTE: IF HOSPITAL-SPECIFIC SUPPLEMENTAL QUESTION(S) ARE ADDED, THE MANDATORY TRANSITION STATEMENT MUST BE PLACED IMMEDIATELY BEFORE THE SUPPLEMENTAL QUESTION(S).*

---

**THANK YOU**

**Please return the completed survey in the postage-paid envelope.**

**[NAME OF SURVEY VENDOR OR SELF-ADMINISTERING HOSPITAL]**

**[RETURN ADDRESS OF SURVEY VENDOR OR SELF-ADMINISTERING HOSPITAL]**

*Questions 1-19 and 23-29 are part of the HCAHPS Survey and are works of the U.S. Government. These HCAHPS questions are in the public domain and therefore are NOT subject to U.S. copyright laws. The three Care Transitions Measure® questions (Questions 20-22) are copyright of Eric A. Coleman, MD, MPH, all rights reserved.*

**eFigure 3. Frequency of Missingness for Hospitals Over the Study Period (2013-2019)**

There were 256 hospitals (out of 3019 total hospitals, 8.48%) that demonstrated missingness over the study period (2013-2019). Years of missing data are the result of unobserved years of reporting into HCAPHS or responses not being publicly available in the data. See table below.

| Years of Complete Data | # Hospitals | % Hospitals | Details on Timing of Missingness |
|------------------------|-------------|-------------|----------------------------------|
| 0                      | 18*         | 0.60        |                                  |
| 1                      | 54          | 1.79        |                                  |
| 2                      | 26          | 0.86        |                                  |
| 3                      | 25          | 0.83        |                                  |
| 4                      | 23          | 0.76        |                                  |
| 5                      | 31          | 1.03        |                                  |
| 6                      | 79          | 2.62        |                                  |
| 7                      | 2763        | 91.52       | Complete panel of observations   |
| Total                  | 3019        | 100%        |                                  |

| # Missing Outcomes (Range 0-7) | # Hospital-Years | % Hospital-Years |
|--------------------------------|------------------|------------------|
| 0                              | 20,243           | 95.79            |
| 1                              | 2                | 0.01             |
| 3                              | 1                | 0.00             |
| 7                              | 887              | 4.20             |

Survey responses were consistent within-year reporting. For example, if a hospital had at least 1 survey response, they were highly likely to have all responses in that year. We examined 7 outcome variables at the hospital-year level. Of 21,133 hospital-year observations, 20,243 (95.79%) had complete data across the 7 outcomes, 887 (4.20%) were missing all 7 responses in a given year, 2 (0.01%) hospitals were missing 1 outcome in 2014 and 1 (<0.001%) hospital in 2015 was missing 3 outcomes. See tables above.

| Year  | # (%) Hospitals Missing 7 Outcomes | # (%) Hospitals Missing 3 Outcomes | # (%) Hospitals Missing 1 Outcome |
|-------|------------------------------------|------------------------------------|-----------------------------------|
| 2013  | 122 (0.58)                         | 0                                  | 0                                 |
| 2014  | 139 (0.66)                         | 0                                  | 2                                 |
| 2015  | 125 (0.59)                         | 1                                  | 0                                 |
| 2016  | 127 (0.60)                         | 0                                  | 0                                 |
| 2017  | 121 (0.57)                         | 0                                  | 0                                 |
| 2018  | 108 (0.51)                         | 0                                  | 0                                 |
| 2019  | 145 (0.69)                         | 0                                  | 0                                 |
| Total | 887 (4.20)                         | 1                                  | 2                                 |

|                      | <b>Total<br/>N=21,113</b>                           | <b>Non-CARE Act<br/>N=5516</b>                      | <b>CARE Act<br/>N=15617</b>                         |
|----------------------|-----------------------------------------------------|-----------------------------------------------------|-----------------------------------------------------|
| <b>Year</b>          | <b># (%) Hospitals<br/>Missing Any<br/>Outcomes</b> | <b># (%) Hospitals<br/>Missing Any<br/>Outcomes</b> | <b># (%) Hospitals<br/>Missing Any<br/>Outcomes</b> |
| 2013                 | 122 (4.04)                                          | 35 (4.44)                                           | 87 (3.9)                                            |
| 2014                 | 141 (4.67)                                          | 63 (7.99)                                           | 78 (3.5)                                            |
| 2015                 | 126 (4.17)                                          | 63 (7.99)                                           | 63 (2.82)                                           |
| 2016                 | 127 (4.21)                                          | 63 (7.99)                                           | 64 (2.87)                                           |
| 2017                 | 121 (4.01)                                          | 64 (8.12)                                           | 57 (2.55)                                           |
| 2018                 | 108 (3.58)                                          | 62 (7.87)                                           | 46 (2.06)                                           |
| 2019                 | 145 (4.80)                                          | 72 (9.14)                                           | 73 (3.27)                                           |
| Total hospital-years | 890 (4.20)                                          | 422 (7.7)                                           | 468 (3.0)                                           |

We examined hospital characteristics by missingness across all years in the study period. Given

hospitals characteristics such as hospital ownership or size may be potential explanations for why hospitals may not have had data available or have had data missing during the study period. Several observations that were missing data for the outcomes were also missing from the American Hospital Association (AHA) dataset from which we received information about hospital characteristics.

| <b>Characteristics</b>              | <b>Hospital-year observations, No. (%)</b> |                                       |
|-------------------------------------|--------------------------------------------|---------------------------------------|
|                                     | <b>Missing data<br/>(n= 890)</b>           | <b>No missing data<br/>(n=20,243)</b> |
| <b>Urban</b>                        |                                            |                                       |
| Rural                               | 132 (18.0%)                                | 5489 (27.3%)                          |
| Urban                               | 600 (82.0%)                                | 14,651 (72.7%)                        |
| <b>Size</b>                         |                                            |                                       |
| Small (<100)                        | 736 (82.7%)                                | 5878 (29.0%)                          |
| Medium (100-399)                    | 143 (16.1%)                                | 11,269 (55.7%)                        |
| Large (>400)                        | 11 (1.2%)                                  | 3096 (15.3%)                          |
| <b>Profit</b>                       |                                            |                                       |
| Government                          | 136 (15.3%)                                | 2856 (14.1%)                          |
| Nonprofit                           | 321 (36.1%)                                | 13,314 (65.8%)                        |
| For-profit                          | 429 (48.2%)                                | 4073 (20.1%)                          |
| Other                               | 4 (0.4%)                                   | 0 (0%)                                |
| <b>Region</b>                       |                                            |                                       |
| Northeast                           | 52 (7.4%)                                  | 3149 (15.6%)                          |
| Midwest                             | 139 (19.7%)                                | 4732 (23.4%)                          |
| South                               | 397 (56.4%)                                | 8420 (41.6%)                          |
| West                                | 116 (16.5%)                                | 3940 (19.5%)                          |
| <b>Teaching</b>                     |                                            |                                       |
| Non-teaching                        | 779 (87.5%)                                | 12,458 (61.5%)                        |
| Case Mix Index, mean (SD)           | 1.7 (0.7)                                  | 1.5 (0.3)                             |
| Proportion Medicare days, mean (SD) | 51.1 (18.4)                                | 51.4 (13.4)                           |
| Proportion Medicaid days, mean (SD) | 12.8 (14.4)                                | 20.6 (12.6)                           |



**eTable 6. Hospital Characteristics by CARE Act Status Across All Years (2013-2019)**

| Characteristics                          | Hospital-year observations, No. (%) |                       |
|------------------------------------------|-------------------------------------|-----------------------|
|                                          | Non-CARE Act<br>(n=4025)            | CARE Act<br>(n=15358) |
| Hospitals, No.                           | 575                                 | 2188                  |
| Size                                     |                                     |                       |
| Small (<100)                             | 1110 (27.6%)                        | 4171 (27.2%)          |
| Medium (100-399)                         | 2213 (55.0%)                        | 8821 (57.4%)          |
| Large (≥400)                             | 702 (17.4%)                         | 2366 (15.4%)          |
| Profit Status                            |                                     |                       |
| Government                               | 753 (18.7%)                         | 1968 (12.8%)          |
| Nonprofit                                | 2194 (54.5%)                        | 10717 (69.8%)         |
| For-profit                               | 1078 (26.8%)                        | 2673 (17.4%)          |
| Region                                   |                                     |                       |
| Northeast                                | 42 (1.0%)                           | 3031 (19.8%)          |
| Midwest                                  | 490 (12.2%)                         | 4081 (26.6%)          |
| South                                    | 3108 (77.2%)                        | 4872 (31.5%)          |
| West                                     | 385 (9.6%)                          | 3374 (22.0%)          |
| Urbanicity                               |                                     |                       |
| Rural                                    | 1109 (27.6%)                        | 4141 (27.1%)          |
| Urban                                    | 2914 (72.4%)                        | 11156 (72.9%)         |
| Teaching Status                          |                                     |                       |
| Non-teaching                             | 262 (6.5%)                          | 1273 (8.5%)           |
| Teaching                                 | 3763 (93.5%)                        | 14043 (91.7%)         |
| Electronic health record                 | 2553 (99.3%)                        | 9827 (98.5%)          |
| Case Mix Index, mean (SD)                | 1.5 (0.3)                           | 1.5 (0.3)             |
| % Medicare days, mean (SD) <sup>a</sup>  | 51.9 (13.1)                         | 51.4 (13.3)           |
| % Medicaid days, mean (SD) <sup>b</sup>  | 19.6 (10.8)                         | 21.1 (13.0)           |
| County-level fraction over 65, mean (SD) | 0.2 (0.1)                           | 0.1 (0.0)             |

<sup>a</sup>Medicare inpatient days/total inpatient days x 100.

<sup>b</sup>Medicaid inpatient days/total inpatient days x 100.

Abbreviation: CARE, Caregiver Advise Record Enable.

## **eAppendix. Estimation Method Used in Callaway and Sant'Anna Differences-in-Differences Approach**

In the Callaway and Sant'Anna (CS) differences-in-differences (DiD) approach, we chose the outcome regression estimation method to identify our estimators. While each of the potential CS DiD estimation methods are equivalent in terms of identification, the outcome regression method allowed for more easily interpretable inferences after conditioning our model on relevant covariates. We also analyzed our data using the doubly-robust estimators, which includes both inverse probability weighting and outcomes regression. We found that our main findings were consistent using this estimation method, therefore, we did not include in this paper.

**eTable 7. Regression Estimates for Parallel Pre-trends**

| <b>Quality Measure</b>          | <b>Pre-2016<br/>Unadjusted<br/>Mean (SD)</b> | <b>Coefficient for<br/>Pre-trend</b> | <b>P</b> |
|---------------------------------|----------------------------------------------|--------------------------------------|----------|
| Nurse communication             | 78.0 (0.03)                                  | -0.03                                | 0.76     |
| Physician communication         | 80.3 (0.03)                                  | -0.09                                | 0.15     |
| Communication about Medications | 62.9 (0.01)                                  | -0.20                                | 0.25     |
| Discharge information           | 86.0 (0.06)                                  | -0.03                                | 0.73     |
| Care Transition Information     | 50.5 (0.10)                                  | -0.15                                | 0.32     |
| Overall Hospital Rating         | 69.5 (0.15)                                  | -0.03                                | 0.78     |
| Recommend Hospital to Others    | 70.1 (0.03)                                  | -0.05                                | 0.66     |

eFigure 5. Performance on HCAHPS Unadjusted Means Over Time—Hospitals in CARE Act States vs. Non-CARE Act States

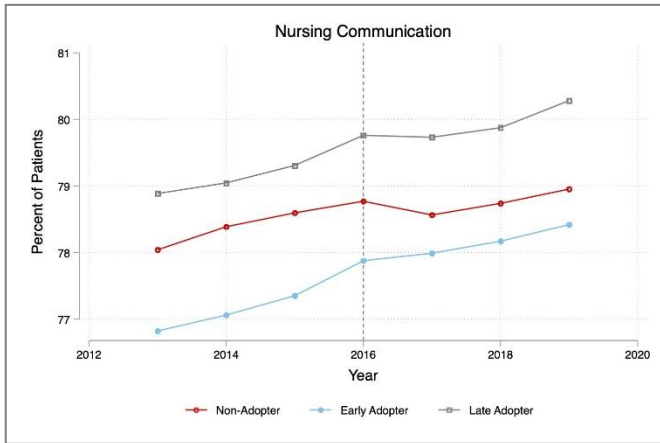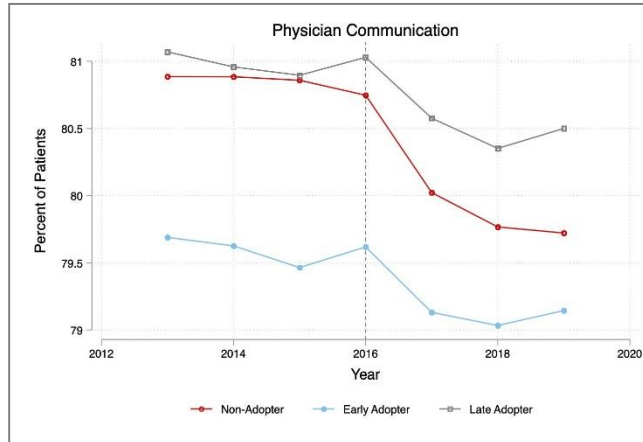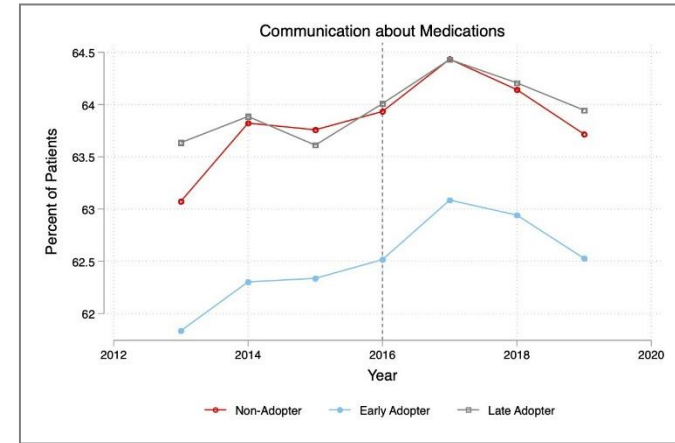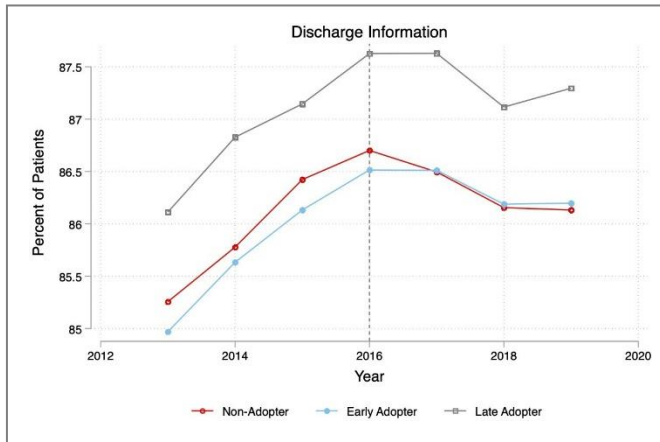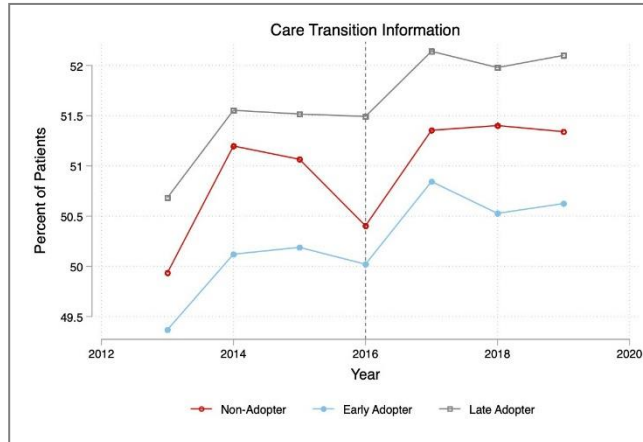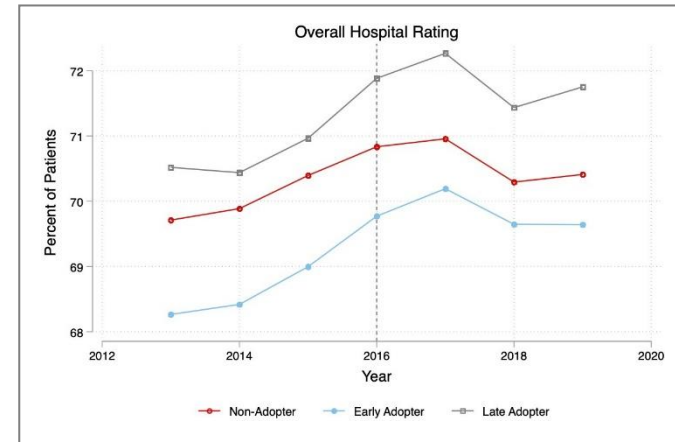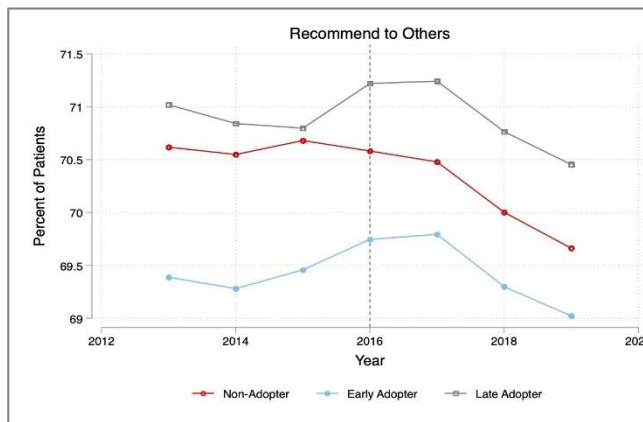

**eFigure 6. Estimates of Adjusted Differences in Care Transition Information Between Hospitals in CARE Act States vs Non-CARE Act States**

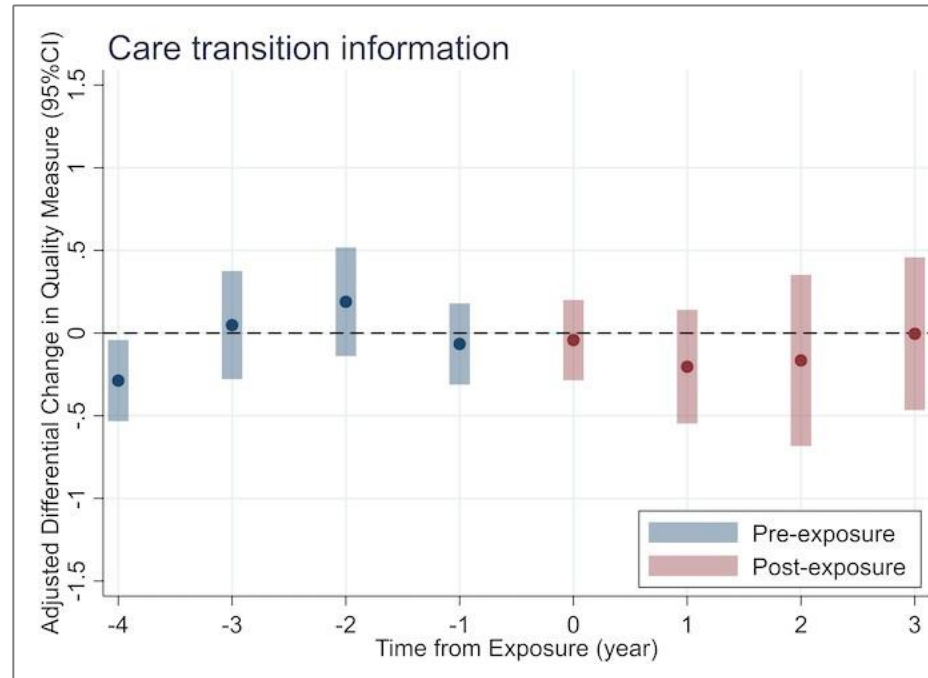

The absolute adjusted difference in quality measure between hospitals located in exposed states and not yet exposed states for each outcome are plotted. The x-axis represents the number of years relative to CARE Act passage with event years greater than 4 years before exposure and 3 years after exposure excluded from the analyses. The sample consisted of 19,383 hospital-year observations and represented 38 exposed and 13 unexposed states. All models adjusted for hospital characteristics (number of beds, ownership type), county-level proportion of 65 and older, and year- and state-fixed effects to reflect the level of the policy exposure.

**eTable 8. Differential Changes in Patient Experience Between Hospitals in CARE Act and Non-CARE Act States by Time From Exposure**

| <b>Time from Exposure (year)</b> | <b>Nursing Communication (95% CI)<sup>a</sup></b> | <b>Physician Communication (95% CI)<sup>a</sup></b> | <b>Communication about Medications (95% CI)<sup>a</sup></b> | <b>Discharge Information (95% CI)<sup>a</sup></b> | <b>Care Transition Information (95% CI)<sup>a</sup></b> | <b>Overall Hospital Rating (95% CI)<sup>a</sup></b> | <b>Recommend Hospital to Others (95% CI)<sup>a</sup></b> |
|----------------------------------|---------------------------------------------------|-----------------------------------------------------|-------------------------------------------------------------|---------------------------------------------------|---------------------------------------------------------|-----------------------------------------------------|----------------------------------------------------------|
| <b>-4</b>                        | 0.02<br>(-0.25, 0.29)                             | -0.09<br>(-0.36, 0.19)                              | -0.29<br>(-0.64, 0.06)                                      | 0.13<br>(-0.13, 0.40)                             | -0.29*<br>(-0.53, -0.04)                                | -0.09<br>(-0.52, 0.33)                              | -0.19<br>(-0.54, 0.16)                                   |
| <b>-3</b>                        | 0.13<br>(-0.06, 0.32)                             | 0.16<br>(-0.03, 0.37)                               | 0.10<br>(-0.24, 0.45)                                       | <0.01<br>(-0.17, 0.16)                            | 0.05<br>(-0.28, 0.38)                                   | 0.09<br>(-0.16, 0.35)                               | 0.08<br>(-0.14, 0.30)                                    |
| <b>-2</b>                        | 0.04<br>(-0.15, 0.22)                             | -0.10<br>(-0.27, 0.06)                              | 0.17<br>(-0.09, 0.43)                                       | 0.08<br>(-0.07, 0.24)                             | 0.19<br>(-0.14, 0.52)                                   | 0.15<br>(-0.12, 0.42)                               | 0.14<br>(-0.12, 0.40)                                    |
| <b>-1</b>                        | 0.19*<br>(0.04, 0.33)                             | 0.11<br>(-0.08, 0.29)                               | -0.07<br>(-0.33, 0.21)                                      | 0.02<br>(-0.11, 0.14)                             | -0.07<br>(-0.31, 0.18)                                  | 0.11<br>(-0.13, 0.34)                               | 0.10<br>(-0.12, 0.33)                                    |
| <b>0</b>                         | 0.11<br>(-0.06, 0.28)                             | 0.12<br>(0.02, 0.26)                                | -0.05<br>(-0.25, 0.15)                                      | 0.10<br>(-0.06, 0.26)                             | -0.04<br>(-0.29, 0.20)                                  | 0.07<br>(-0.26, 0.41)                               | -0.002<br>(-0.33, 0.32)                                  |
| <b>1</b>                         | 0.31**<br>(0.08, 0.53)                            | 0.40*<br>(0.20, 0.59)                               | 0.05<br>(-0.27, 0.38)                                       | 0.23<br>(-0.02, 0.48)                             | -0.20<br>(-0.55, 0.14)                                  | 0.46*<br>(0.11, 0.80)                               | 0.21<br>(-0.16, 0.57)                                    |
| <b>2</b>                         | 0.35*<br>(0.01, 0.68)                             | 0.47*<br>(0.11, 0.84)                               | 0.20<br>(-0.41, 0.80)                                       | 0.30<br>(-0.03, 0.63)                             | -0.17<br>(-0.68, 0.35)                                  | 0.57<br>(-0.04, 1.18)                               | 0.44<br>(-0.24, 1.12)                                    |
| <b>3</b>                         | 0.54*<br>(0.10, 0.98)                             | 0.59**<br>(0.17, 1.0)                               | -0.44<br>(-1.5, 0.60)                                       | 0.07<br>(-0.33, 0.47)                             | -0.004<br>(-0.47, 0.46)                                 | 0.72<br>(-0.11, 1.56)                               | 0.82*<br>(0.10, 1.55)                                    |

\*p≤0.05 \*\*p≤0.01 \*\*\*p≤0.001

<sup>a</sup>Differential change represents the estimated percentage point difference between hospitals in CARE Act states compared to those in Non-CARE Act states after adjusting for number of beds, ownership type and proportion of 65 years and older characteristics. We also adjusted for hospital- and year-fixed effects, and clustered standard errors at the state to reflect the level of the policy exposure

## Sensitivity Analyses

eTable 9. Regression Estimates After Adding Interaction Term Between State and Year

| Quality measure              | Unadjusted mean (SD), % | Adjusted differential change <sup>a</sup> (95% CI) | P     |
|------------------------------|-------------------------|----------------------------------------------------|-------|
| <b>Patient communication</b> |                         |                                                    |       |
| Nursing communication        | 78.4 (0.42)             | 0.18<br>(0.7, 0.28)                                | 0.001 |
| Doctor communication         | 80.0 (0.19)             | 0.46<br>(0.34, 0.57)                               | 0.00  |
| Communication on medications | 63.2 (0.20)             | -0.43<br>(-0.59, -0.27)                            | 0.00  |
| Discharge information        | 86.4 (0.22)             | -0.03<br>(-0.11, 0.05)                             | 0.41  |
| Care transition information  | 50.8 (0.30)             | -0.16<br>(-0.33, 0.01)                             | 0.07  |
| <b>Patient experience</b>    |                         |                                                    |       |
| Overall hospital rating      | 70.1 (0.41)             | 0.24<br>(0.07, 0.41)                               | 0.006 |
| Recommend hospital to others | 70.1 (0.06)             | 0.15<br>(-0.00, 0.30)                              | 0.06  |

<sup>a</sup>Differential change represents the estimated percentage point difference between hospitals in CARE Act states compared to those in Non-CARE Act states after adjusting for number of beds, ownership type and proportion of 65 years and older characteristics. We also adjusted for hospital- and year-fixed effects, and clustered standard errors at the state to reflect the level of the policy exposure.

**eTable 10. Regression Estimates Using Composite Scores of Top Box and Middle Box Responses**

| Quality measure                           | Unadjusted mean (SD), % | Adjusted differential change <sup>a</sup> (95% CI) | P     |
|-------------------------------------------|-------------------------|----------------------------------------------------|-------|
| <b>Patient communication</b>              |                         |                                                    |       |
| Nursing communication <sup>b</sup>        | 95.2 (0.02)             | 0.10<br>(0.05, 0.14)                               | 0.00  |
| Doctor communication <sup>c</sup>         | 95.2 (0.20)             | 0.10<br>(0.02,0.17)                                | 0.01  |
| Communication on medications <sup>d</sup> | 81.1 (0.21)             | 0.03<br>(-0.12,0.19)                               | 0.68  |
| Discharge information                     | NA                      | NA                                                 | NA    |
| Care transition information <sup>e</sup>  | 94.3 (0.08)             | -0.008<br>(-0.8,0.06)                              | 0.82  |
| <b>Patient experience</b>                 |                         |                                                    |       |
| Overall hospital rating <sup>f</sup>      | 91.6 (0.05)             | 0.15<br>(0.06,0.23)                                | <0.01 |
| Recommend hospital to others <sup>g</sup> | 94.5 (0.09)             | 0.06<br>(-0.01,0.14)                               | 0.10  |

<sup>a</sup>Differential change represents the estimated percentage point difference between hospitals in CARE Act states compared to those in Non-CARE Act states after adjusting for number of beds, ownership type and proportion of 65 years and older characteristics. We also adjusted for hospital- and year-fixed effects, and clustered standard errors at the state to reflect the level of the policy exposure

<sup>b</sup>Nurse communication – Percent of patients in a hospital who reported that they ‘Always’ or ‘Usually’ communicated well with nurses

<sup>c</sup>Doctor communication – Percent of patients in a hospital who reported that they ‘Always’ or ‘Usually’ communicated well with physicians

<sup>d</sup>Communication about medications -- Percent of patients in a hospital who reported that they ‘Always’ or ‘Usually’ communicated about medications

<sup>e</sup>Care transition information – Percent of patients in a hospital who reported that they ‘Strongly agree’ or ‘Agree’ they received care transition information

<sup>f</sup>Overall hospital rating – Percent of patients in a hospital who assigned a score of 7 or 8, or a score of 9 or 10 on 10-point scale

<sup>g</sup>Recommend hospital to others – Percent of patients in a hospital who responded “definitely yes” or “probably yes” to whether they would recommend the hospital others
