# Supplementary material for: Patient Experience at US Hospitals Following the Caregiver Advise, Record, Enable (CARE) Act
Source: PubMed Central journal article supplement (PMC10152302; doi:10.1001/jamanetworkopen.2023.11253), 2023-05-01
Supplement: jamanetwopen-e2311253-s002.pdf [file jamanetwopen-e2311253-s002.pdf]

## Data Sharing Statement

Lee. Patient Experience at US Hospitals Following the Caregiver Advise, Record, Enable (CARE) Act. *JAMA Netw Open*. Published May 01, 2023.

doi:10.1001/jamanetworkopen.2023.11253

### Data

**Data available:** Yes

**Data types:** Deidentified participant data

**How to access data:** Data will be available upon request via email to [courtney.lee@pennmedicine.upenn.edu](mailto:courtney.lee@pennmedicine.upenn.edu).

**When available:** With publication

### Supporting Documents

**Document types:** Statistical/analytic code

**How to access documents:** Statistical/Analytic code we be available upon request via email to [courtney.lee@pennmedicine.upenn.edu](mailto:courtney.lee@pennmedicine.upenn.edu)

**When available:** With publication

### Additional Information

**Who can access the data:** Data will be made available to anyone requesting the data.

**Types of analyses:** Data will be made available for any purpose.

**Mechanisms of data availability:** Data will be available without investigator support.
